STICKY WICKET

# Mole's Wow! So now you have your own lab!

## Part XI – Lightning strikes!

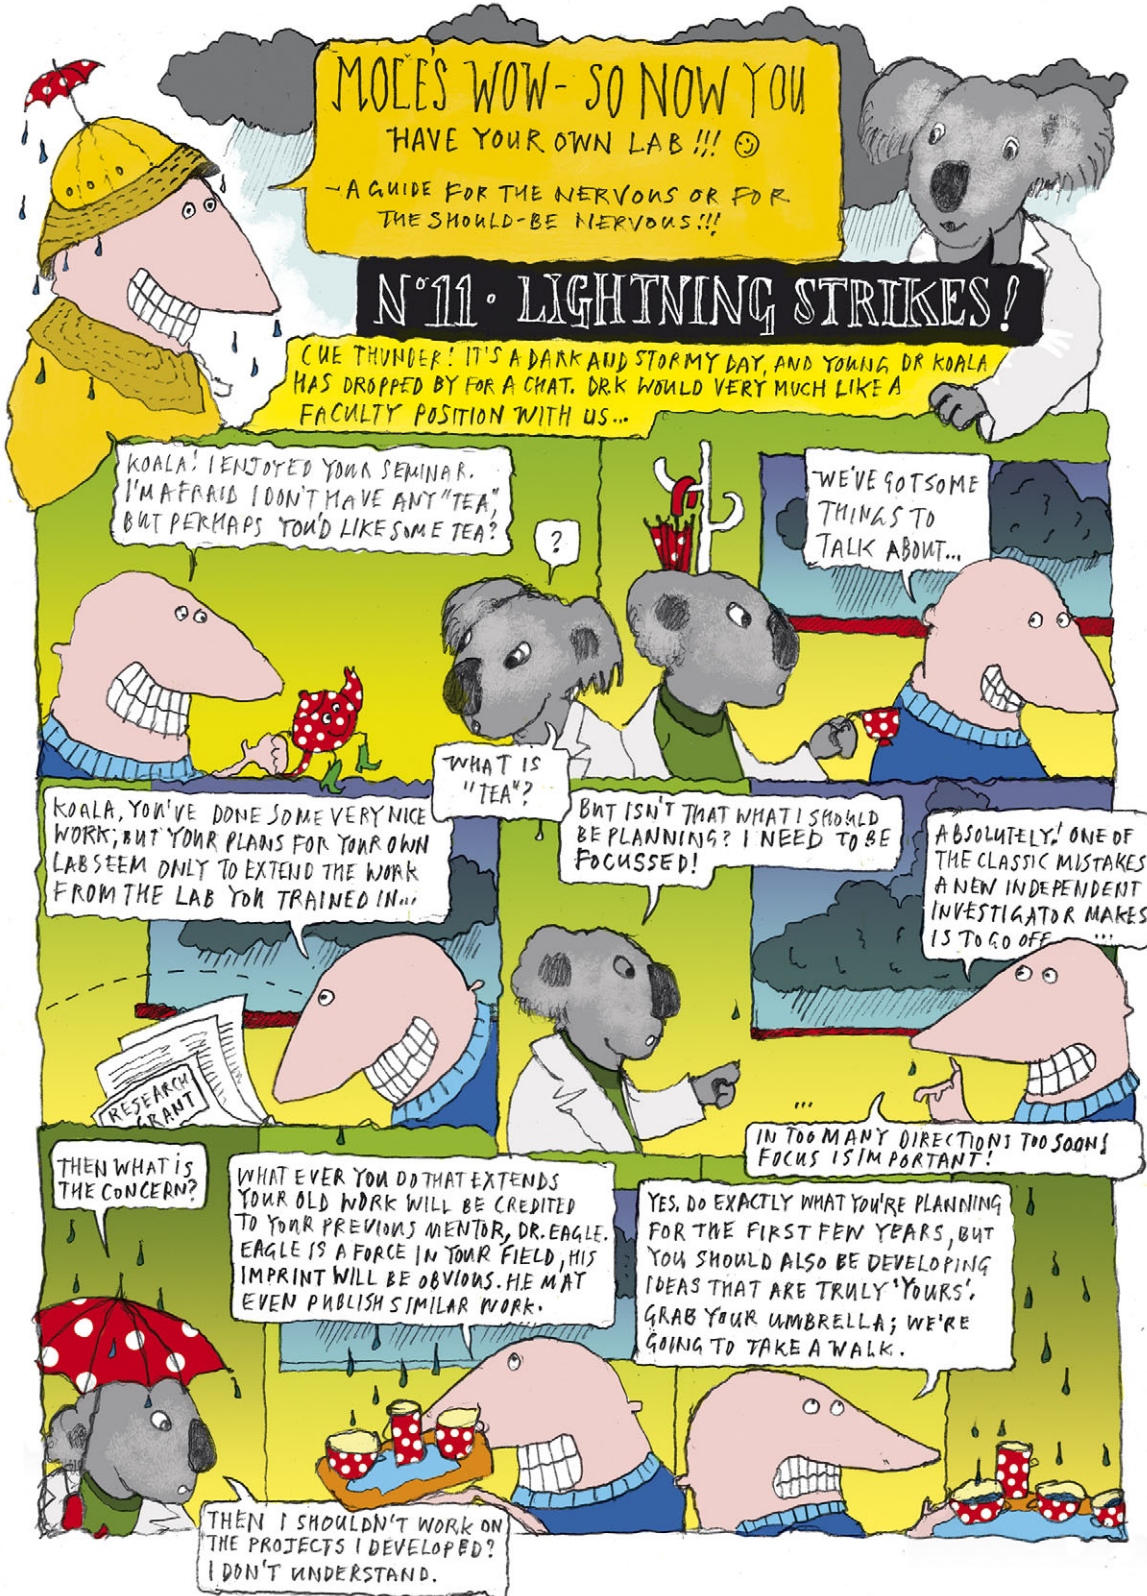

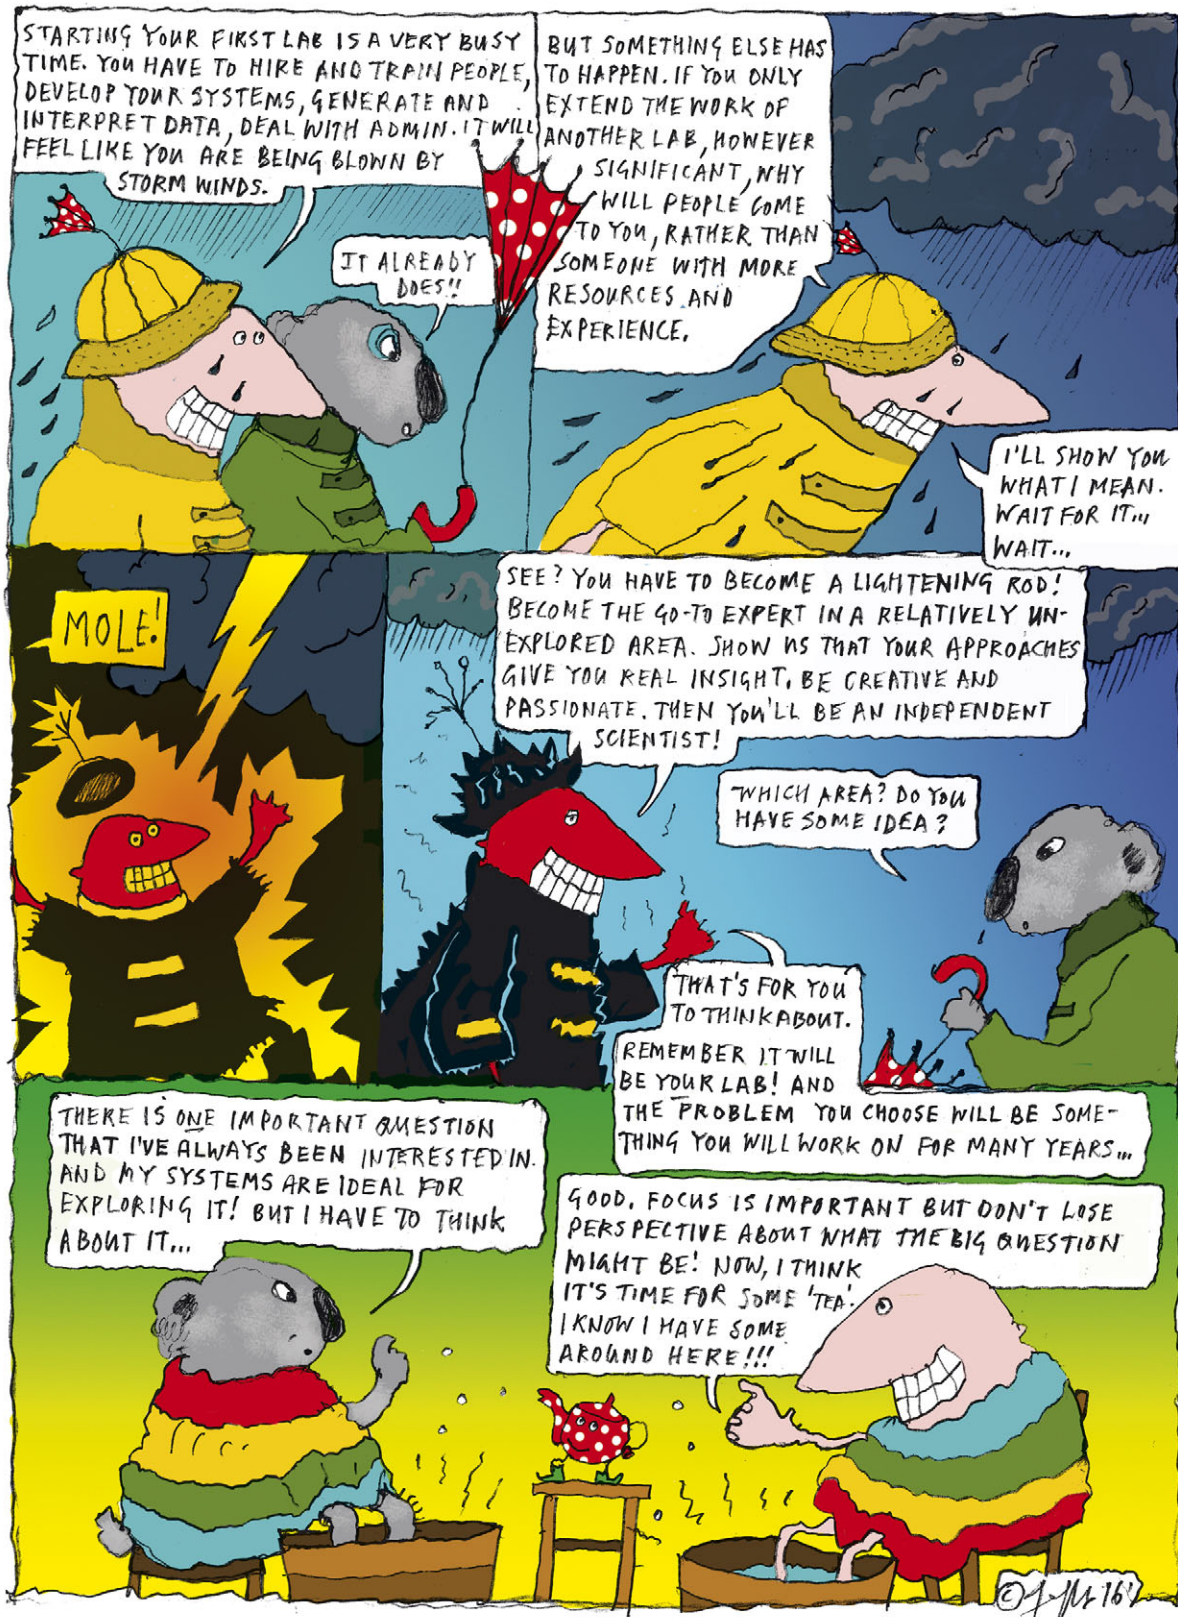

Source: https://cob.silverchair.com/jcs/article-pdf/129/17/3207/1943835/jcs194530.pdf
